# Supplementary material
Source: PubMed Central journal article supplement (PMC5504703)

# Rosenblum Supplementary Figure 1

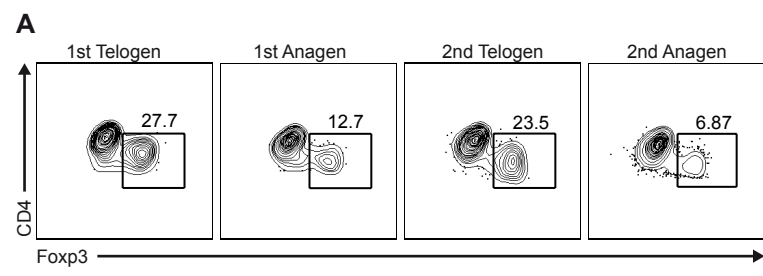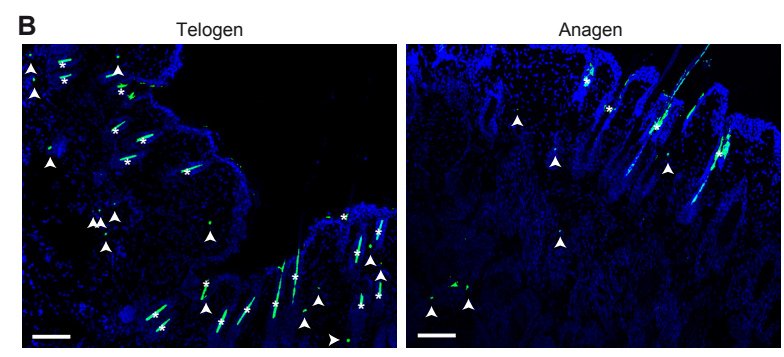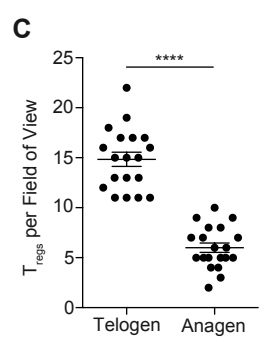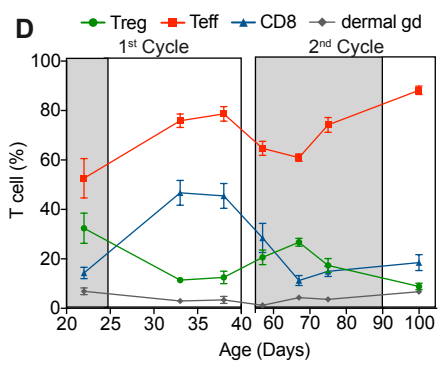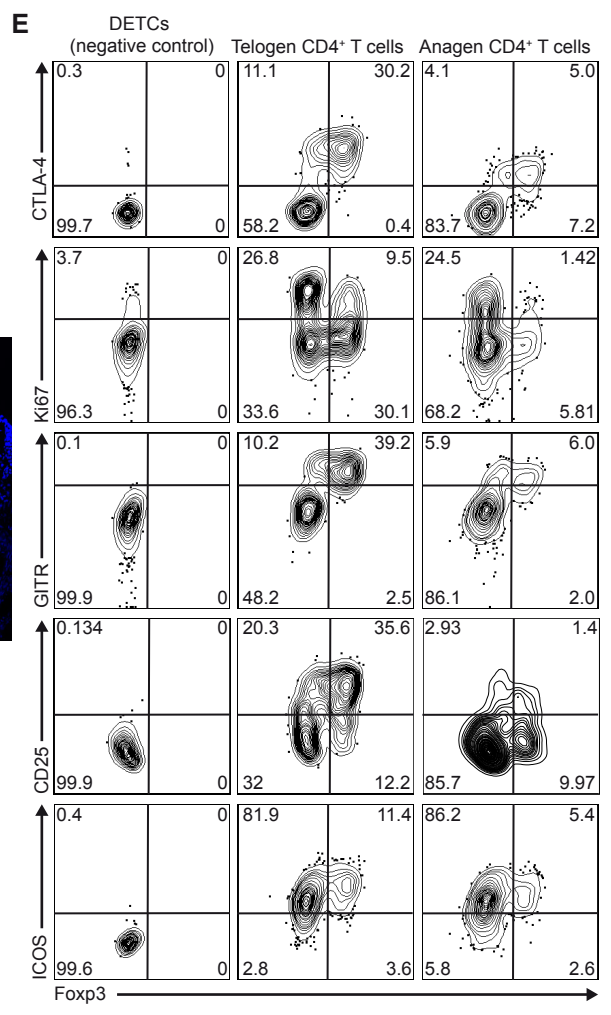

Supplement: NIHMS873913-supplement-3.pdf [file NIHMS873913-supplement-3.pdf]

Rosenblum  
Supplementary Figure 2

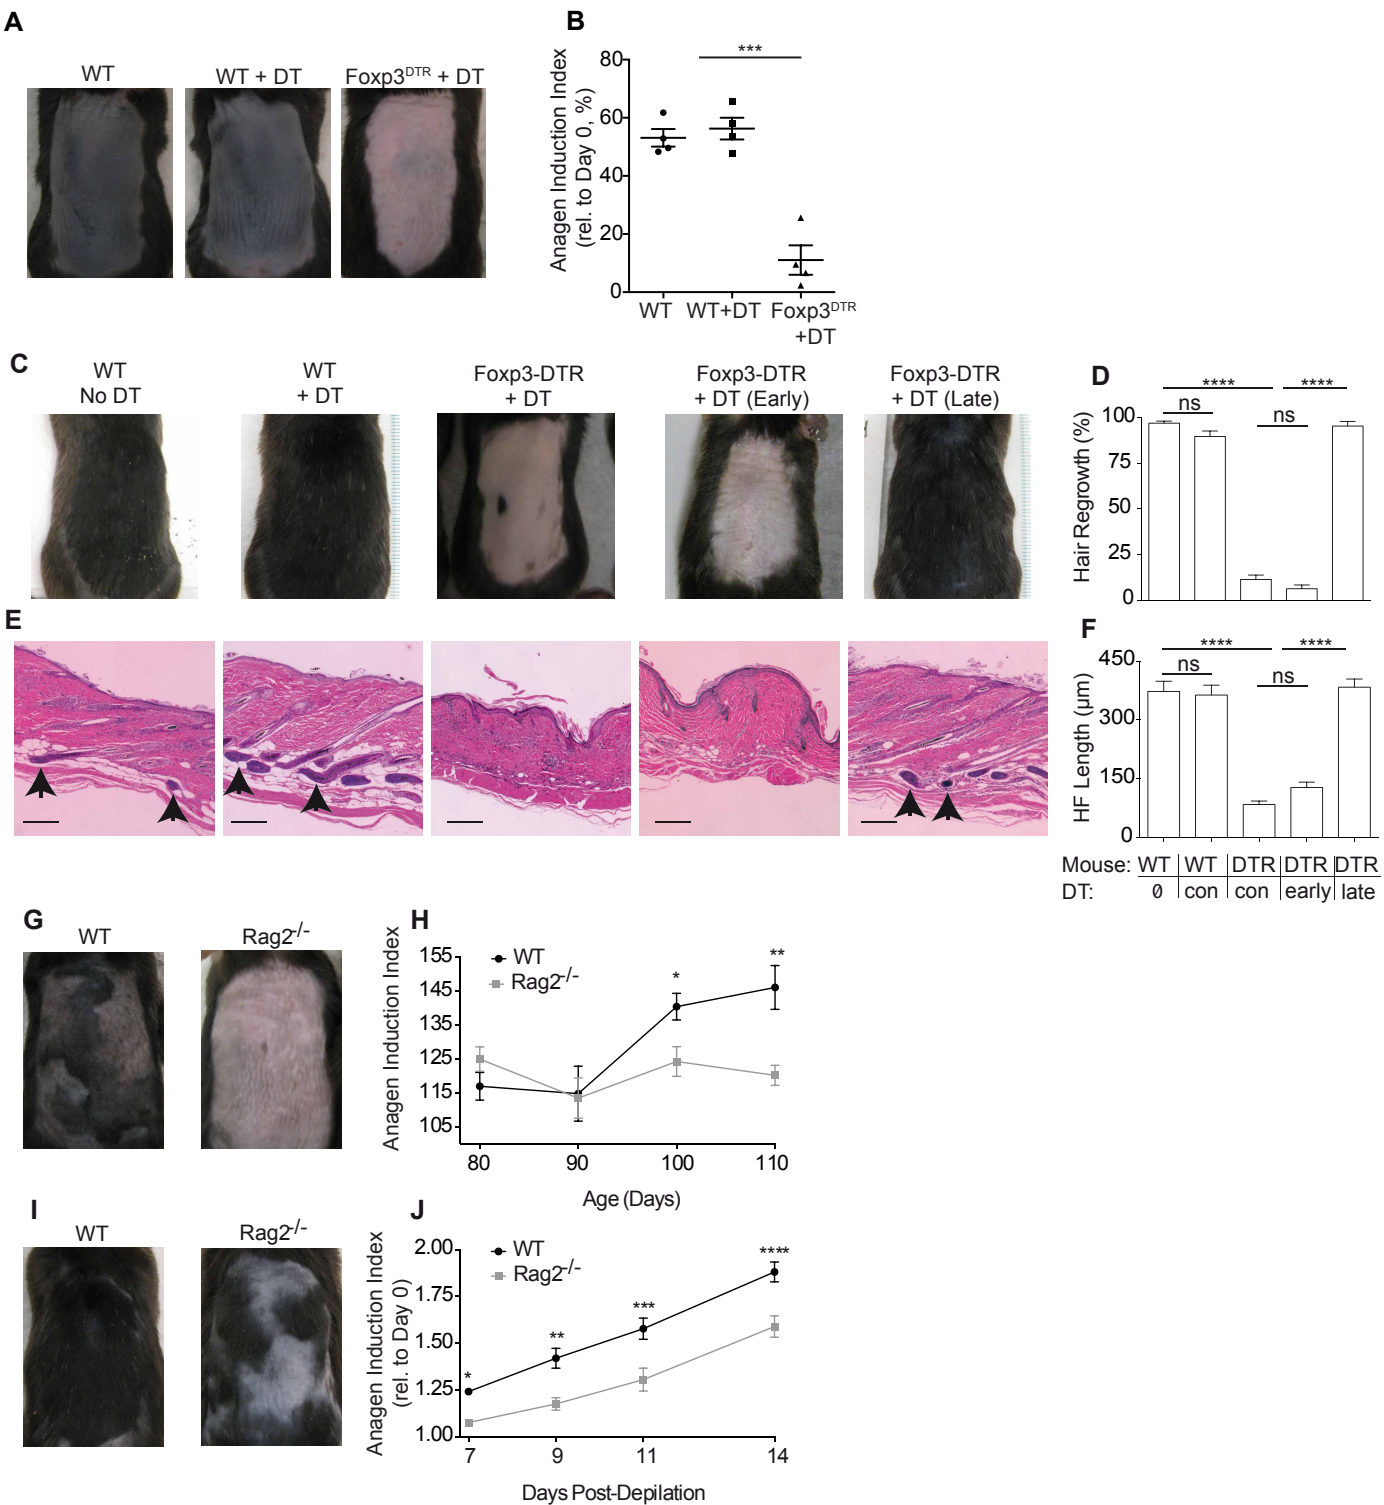

Supplement: NIHMS873913-supplement-4.pdf [file NIHMS873913-supplement-4.pdf]

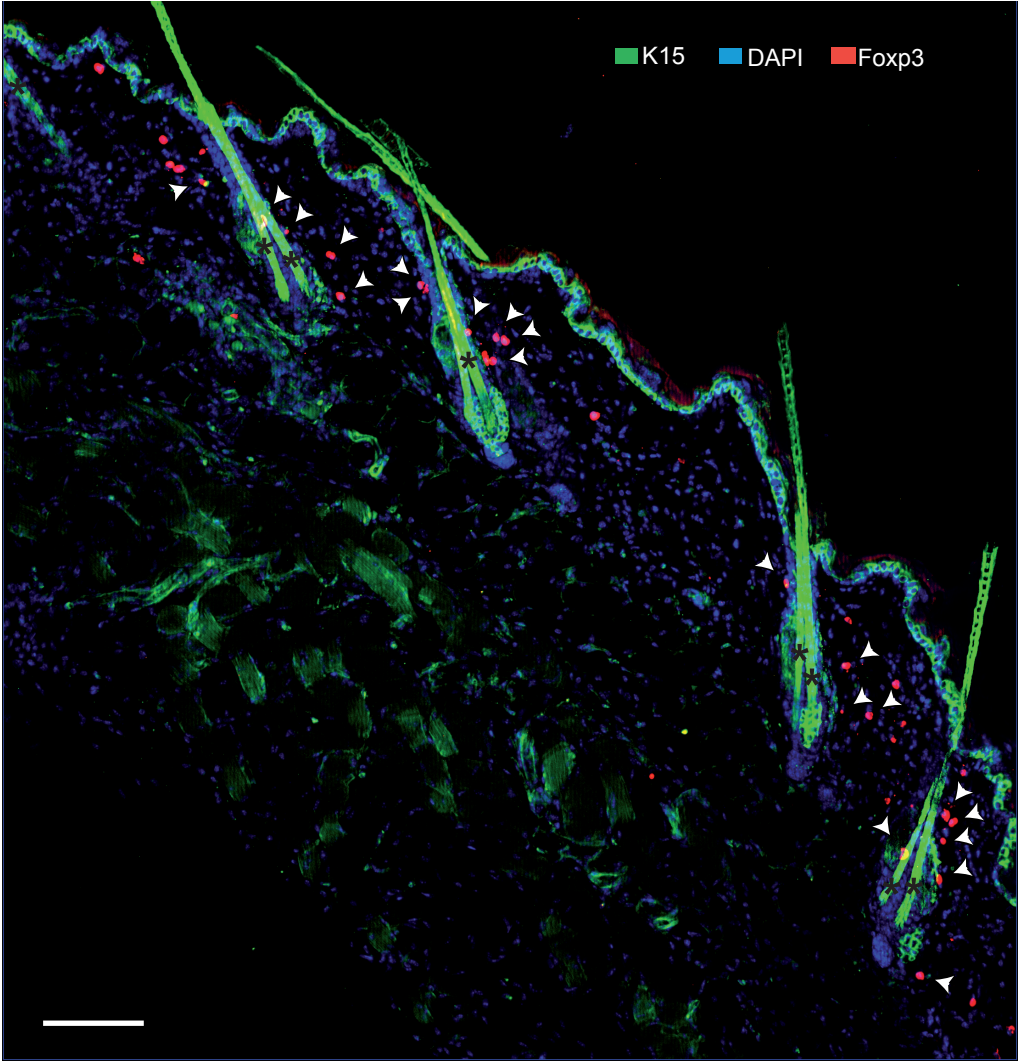

Supplement: NIHMS873913-supplement-5.pdf [file NIHMS873913-supplement-5.pdf]

**Rosenblum  
Supplementary Figure 4**

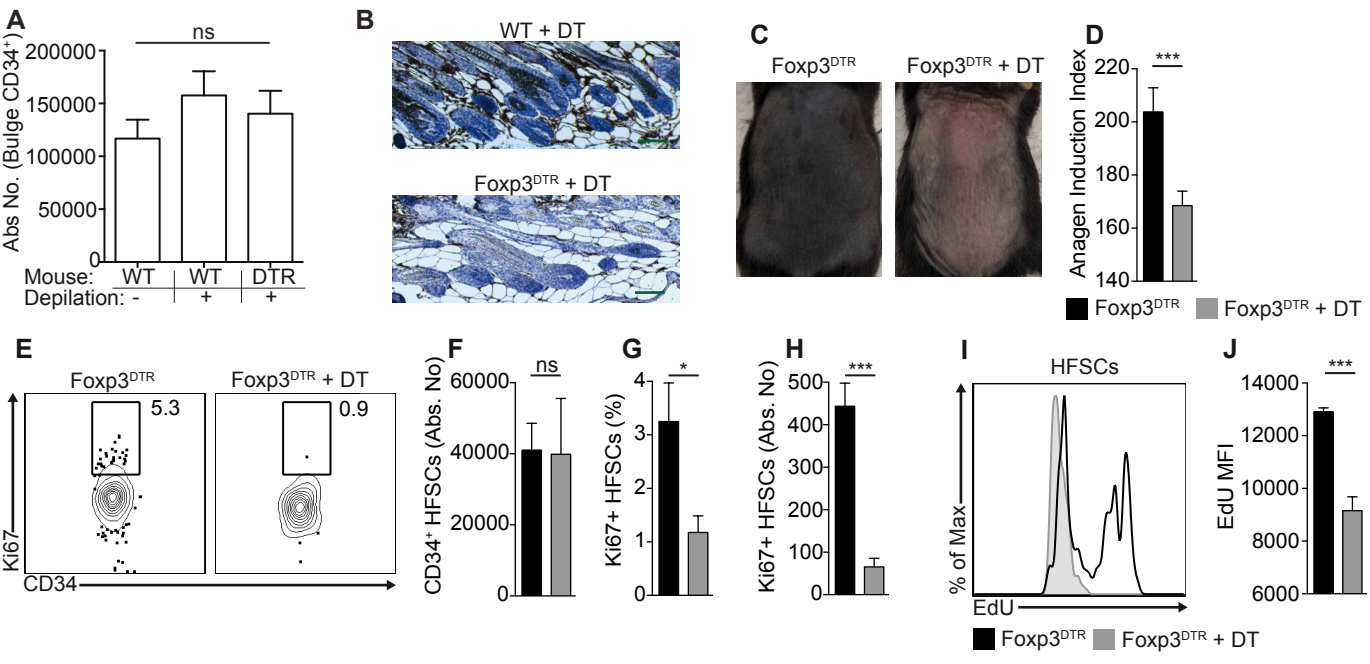

Supplement: NIHMS873913-supplement-6.pdf [file NIHMS873913-supplement-6.pdf]

Rosenblum  
Supplementary Figure 5

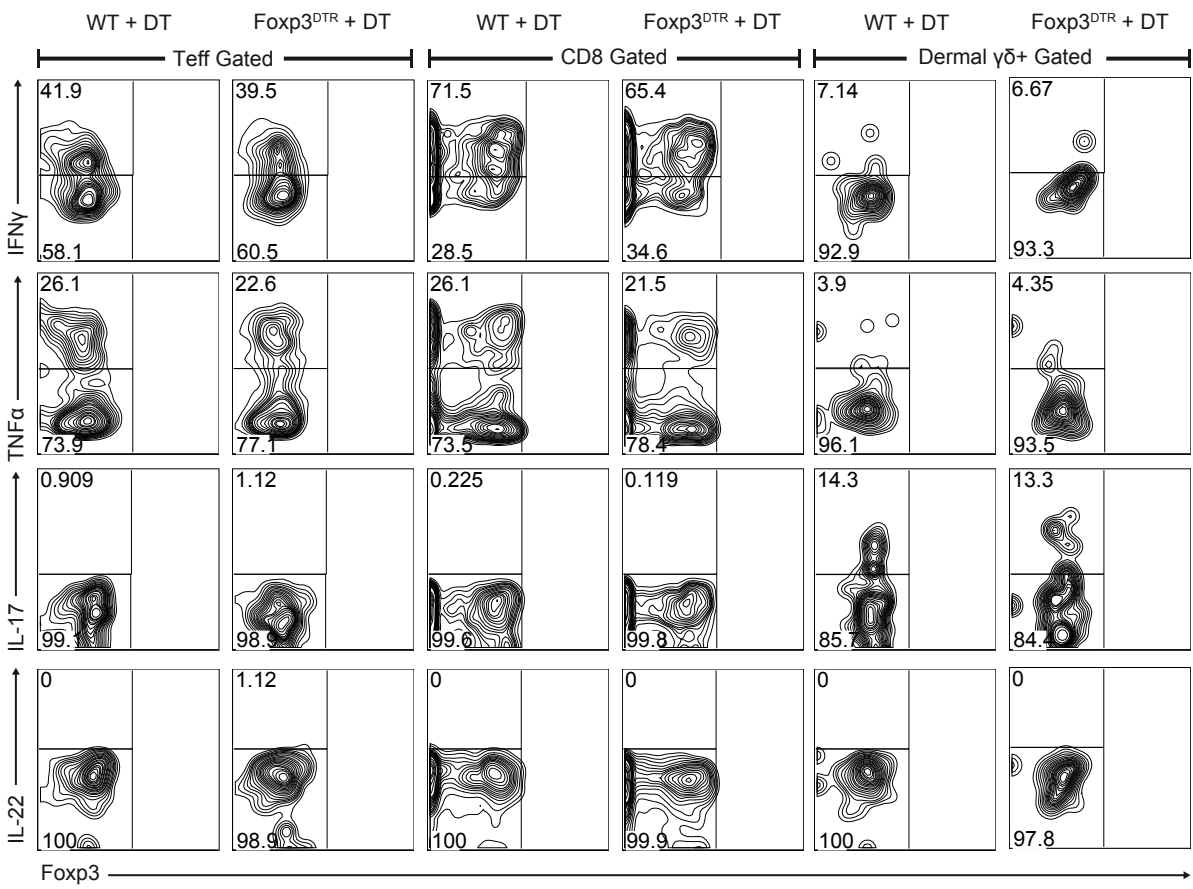

Supplement: NIHMS873913-supplement-7.pdf [file NIHMS873913-supplement-7.pdf]

# Rosenblum Supplementary Figure 6

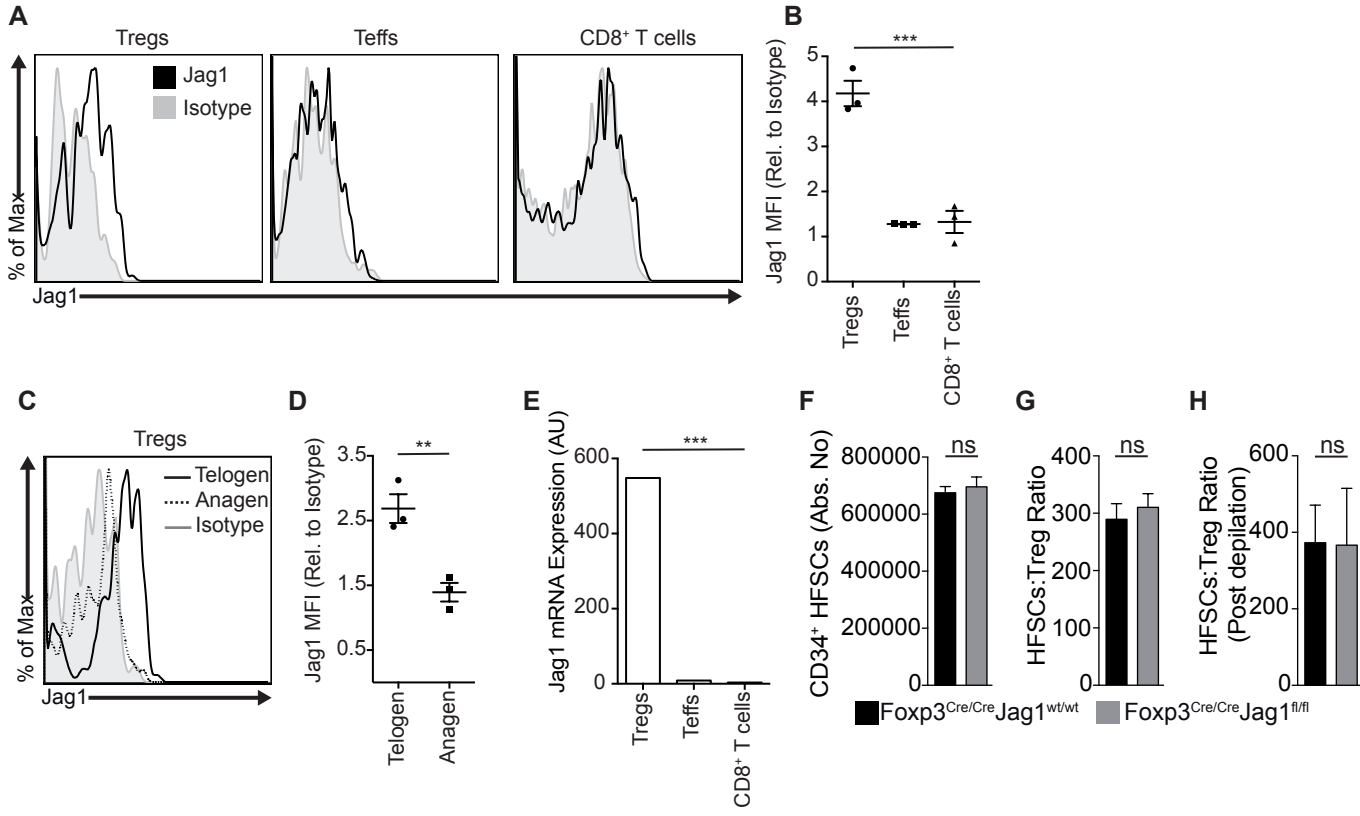

Supplement: NIHMS873913-supplement-8.pdf [file NIHMS873913-supplement-8.pdf]
